# Supplementary material
Source: Springer Nature journal article supplement (https://www.springermedizin.de/resource/supplementary/12955_2006_249_MOESM2_ESM.pdf/9559986)

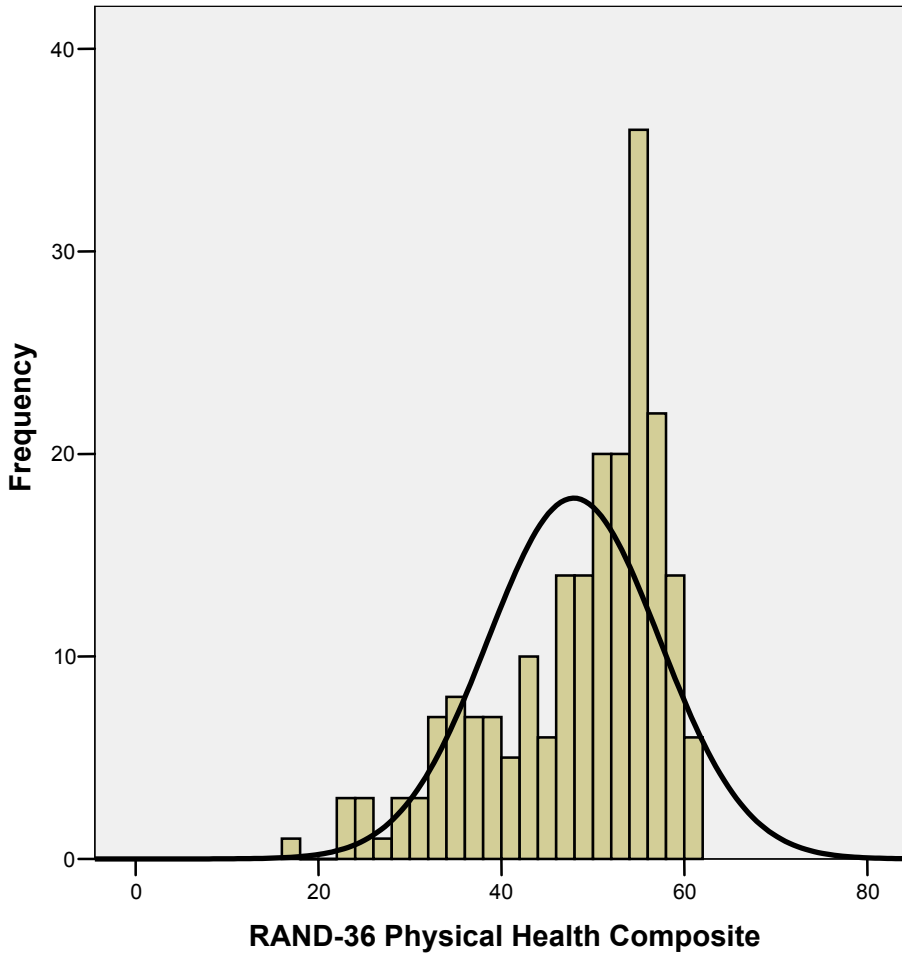

Mean = 47.92  
Std. Dev. = 9.41  
N = 210

Supplement: MOESM2 [file 9559986]
